# Supplementary material
Source: PubMed Central journal article supplement (PMC2747594)
Supplement: NIHMS97873-supplement-2.pdf [file NIHMS97873-supplement-2.pdf]

**DNA Mismatch Binding and Anti-proliferative Activity of Rhodium  
Metalloinsertors**

**Supporting Information**

**Russell J. Ernst, Hang Song, and Jacqueline K. Barton\***

*Division of Chemistry and Chemical Engineering*

*California Institute of Technology*

*Pasadena CA 91125*

\* To whom correspondence should be addressed at [jkbarton@caltech.edu](mailto:jkbarton@caltech.edu)

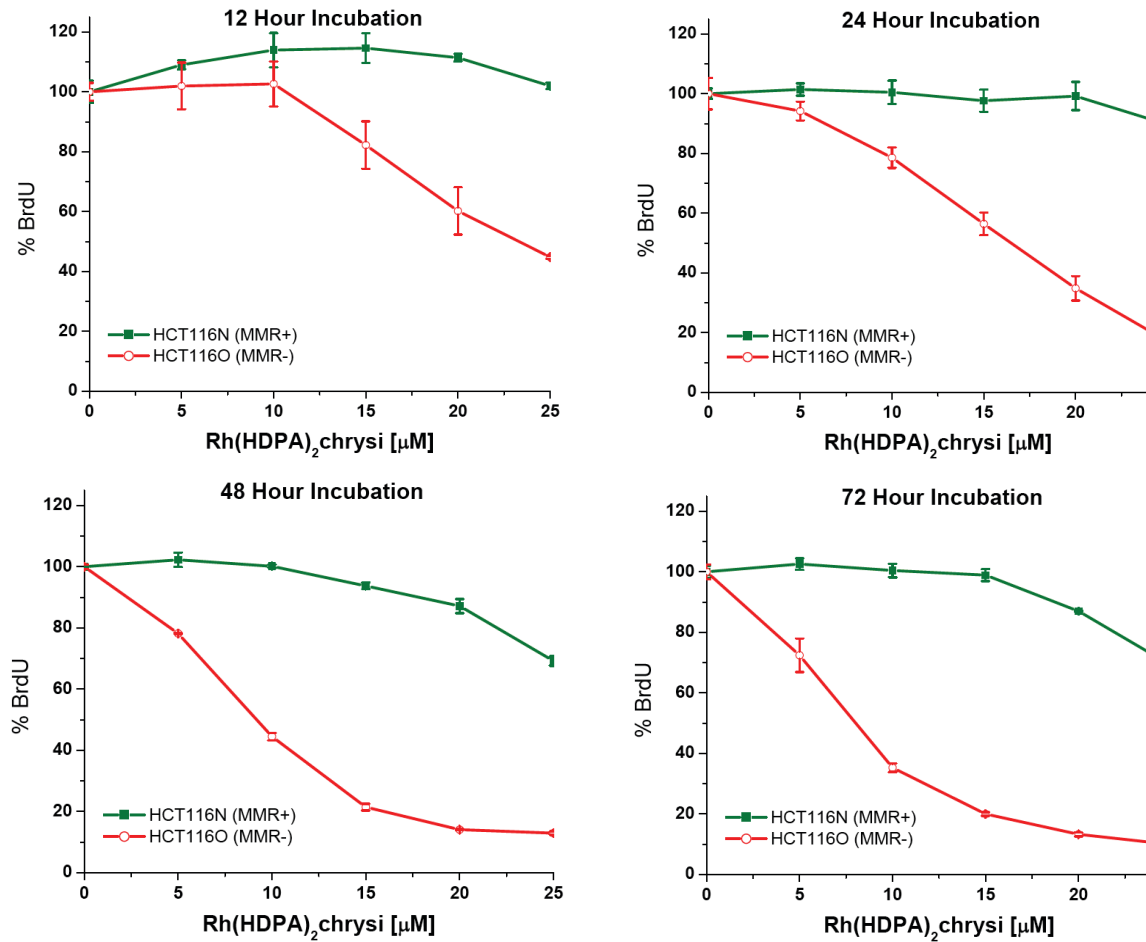

**Figure S1.** Inhibitory effects of *rac*-Rh(HDPA)<sub>2</sub>chrysi<sup>3+</sup> as a function of incubation time on cellular proliferation. Shown are plots of BrdU incorporation (a measure of DNA synthesis and therefore cellular proliferation) normalized to the BrdU incorporation of untreated cells as a function of rhodium concentration. Standard error bars for 5 trials are shown. MMR-proficient HCT116N cells (green) and MMR-deficient HCT116O cells (red) were plated and allowed 24 hours to adhere before incubation with 0-25  $\mu$ M *rac*-Rh(HDPA)<sub>2</sub>chrysi<sup>3+</sup> for 12, 24, 48, or 72 hours. At the end of the 12, 24, and 48 hour incubations, the media containing Rh was replaced with fresh media for the remainder of the 72 hours, followed by ELISA analysis. BrdU was added to the media 24 hours prior to analysis.

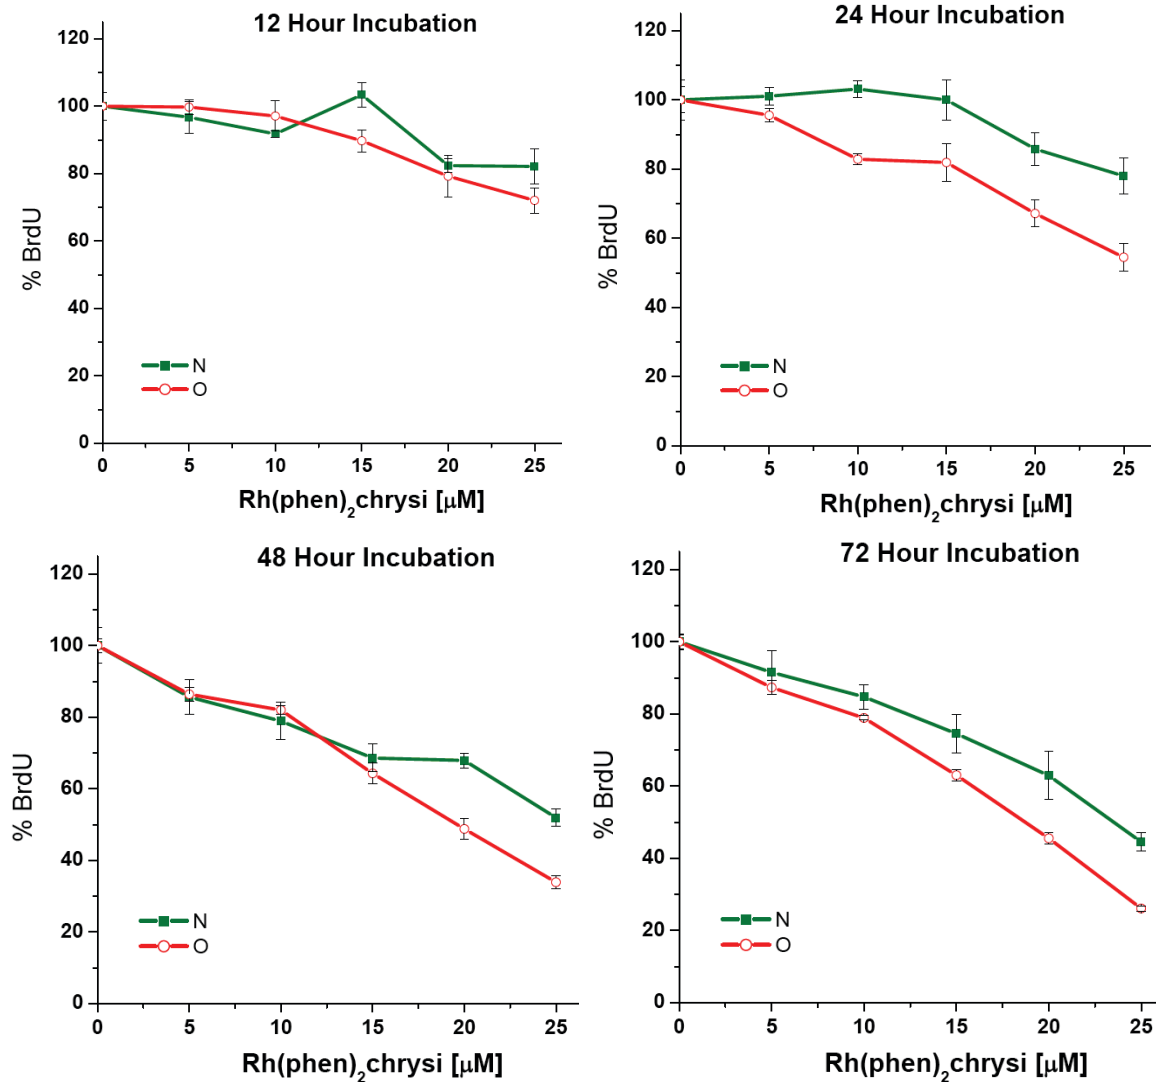

**Figure S2.** Inhibitory effects of *rac*- $Rh(phen)_2chrysi^{3+}$  as a function of incubation time on cellular proliferation. Shown are plots of BrdU incorporation (a measure of DNA synthesis and therefore cellular proliferation) normalized to the BrdU incorporation of untreated cells as a function of rhodium concentration. Standard error bars for 5 trials are shown. MMR-proficient HCT116N cells (green) and MMR-deficient HCT116O cells (red) were plated and allowed 24 hours to adhere before incubation with 0-25  $\mu M$  *rac*- $Rh(phen)_2chrysi^{3+}$  for 12, 24, 48, or 72 hours. At the end of the 12, 24, and 48 hour incubations, the media containing Rh was replaced with fresh media for the remainder of the 72 hours, followed by ELISA analysis. BrdU was added to the media 24 hours prior to analysis.
